# Supplementary material for: Laminin Alpha 2 Enhances the Protective Effect of Exosomes on Human iPSC-Derived Cardiomyocytes in an In Vitro Ischemia-Reoxygenation Model
Source: Int J Mol Sci. 2024 Mar 28;25(7):3773. doi: 10.3390/ijms25073773 (PMC11011704; doi:10.3390/ijms25073773)
Supplement: Supplementary file 1 [file ijms-25-03773-s001.zip › ijms-2872617-supplementary.pdf]

## **Supplement**

# **Laminin Alpha 2 Enhances the Protective Effect of Exosomes on Human iPSC-Derived Cardiomyocytes in an In Vitro Ischemia-Reoxygenation Model**

**Fernanda C. P. Mesquita <sup>1</sup>, Madelyn King <sup>1</sup>, Patricia Luciana da Costa Lopez <sup>1</sup>, Shiyanth Thevasagayampillai <sup>2</sup>, Preethi H. Gunaratne <sup>2</sup> and Camila Hochman-Mendez <sup>1,\*</sup>**

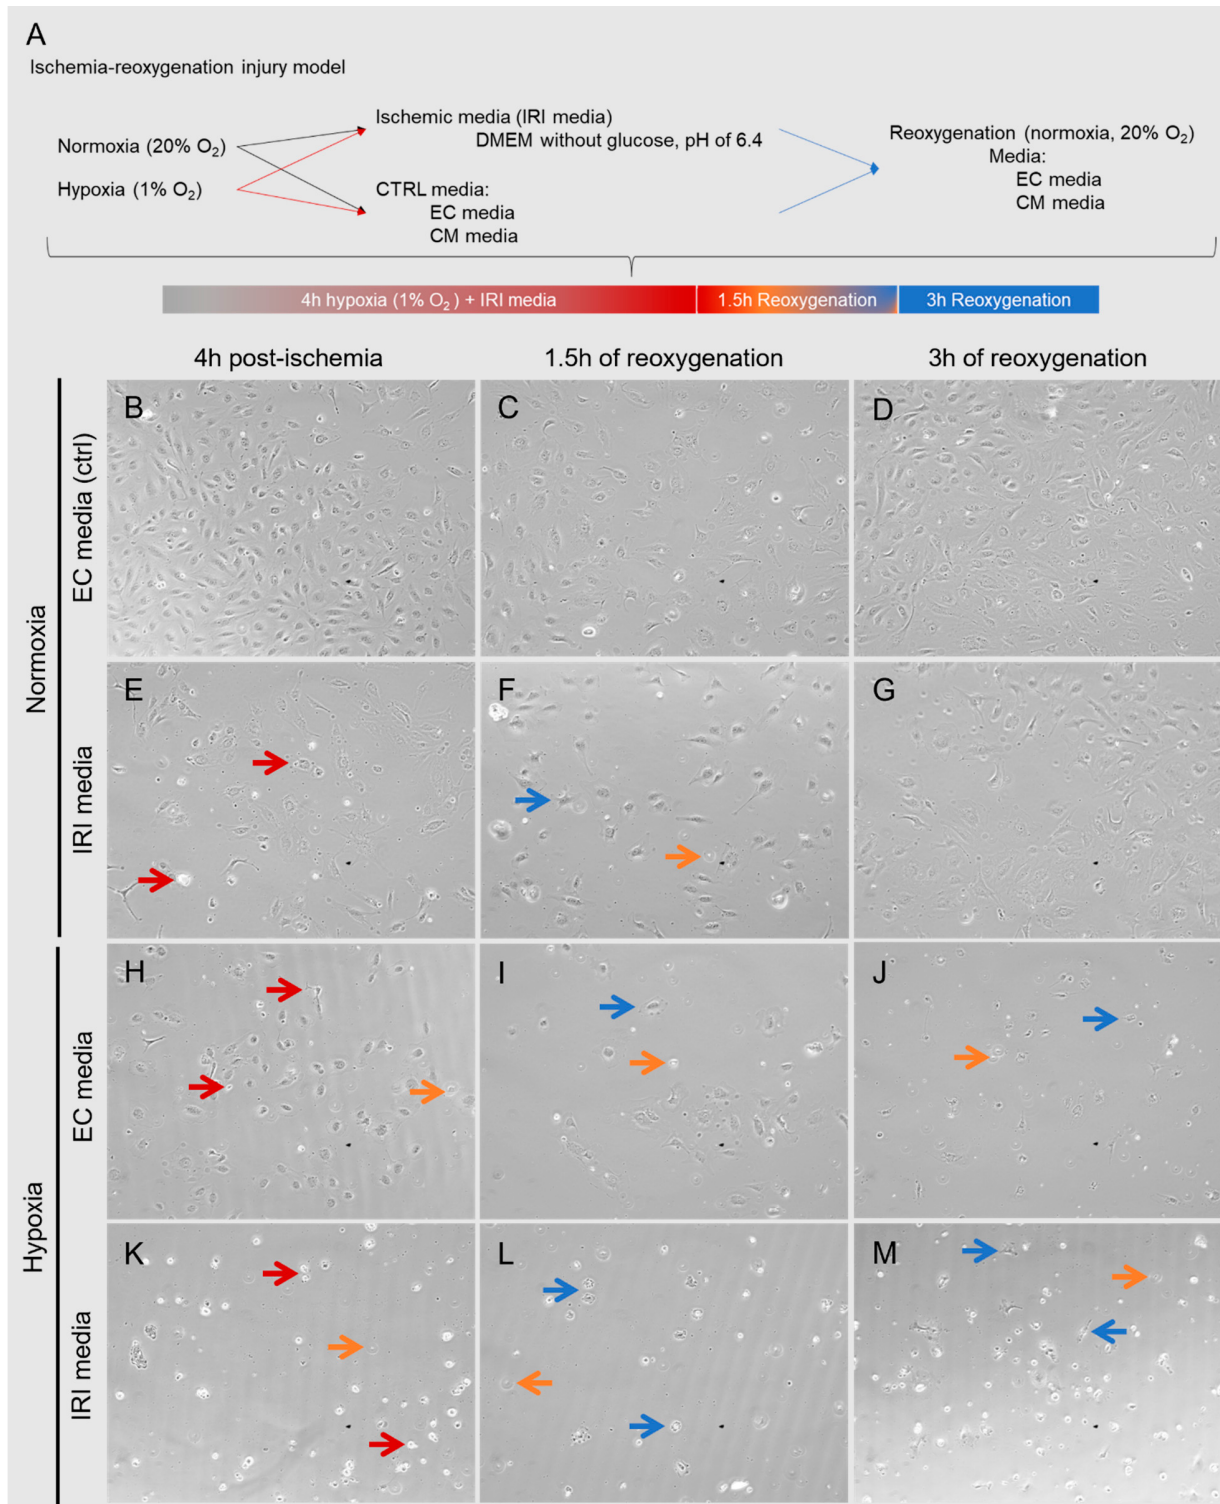

**Supplemental Figure S1.** Ischemia-reoxygenation in vitro model. A. Schematic diagram showing the main steps of the ischemia-reoxygenation in vitro. EC, endothelial cells; CM, cardiomyocytes. B. Brightfield images of endothelial cells under normoxia and hypoxia, and after 1.5 and 3 hours of reoxygenation. Blue arrows indicate healthy cells, orange arrows injured cells, and red arrows (floating) dead cells.

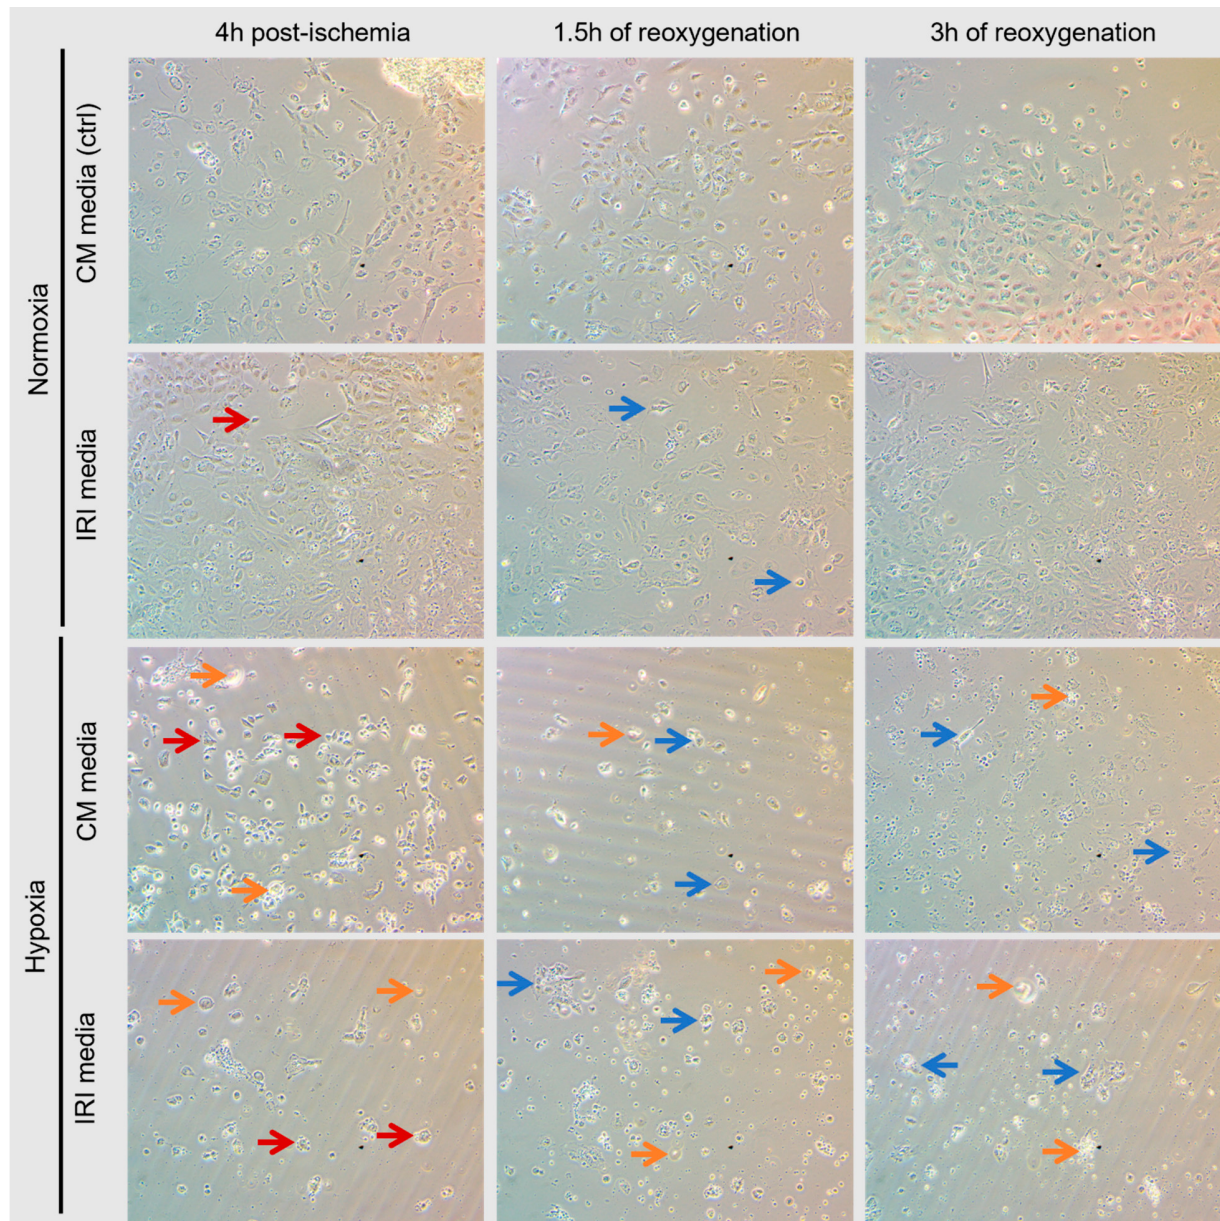

**Supplemental Figure S2.** Brightfield images of cardiomyocytes under normoxia and hypoxia, and after 1.5 and 3 hours of reoxygenation. Blue arrows indicate healthy cells, orange arrows indicate injured cells, and red arrows indicate (floating) dead cells.

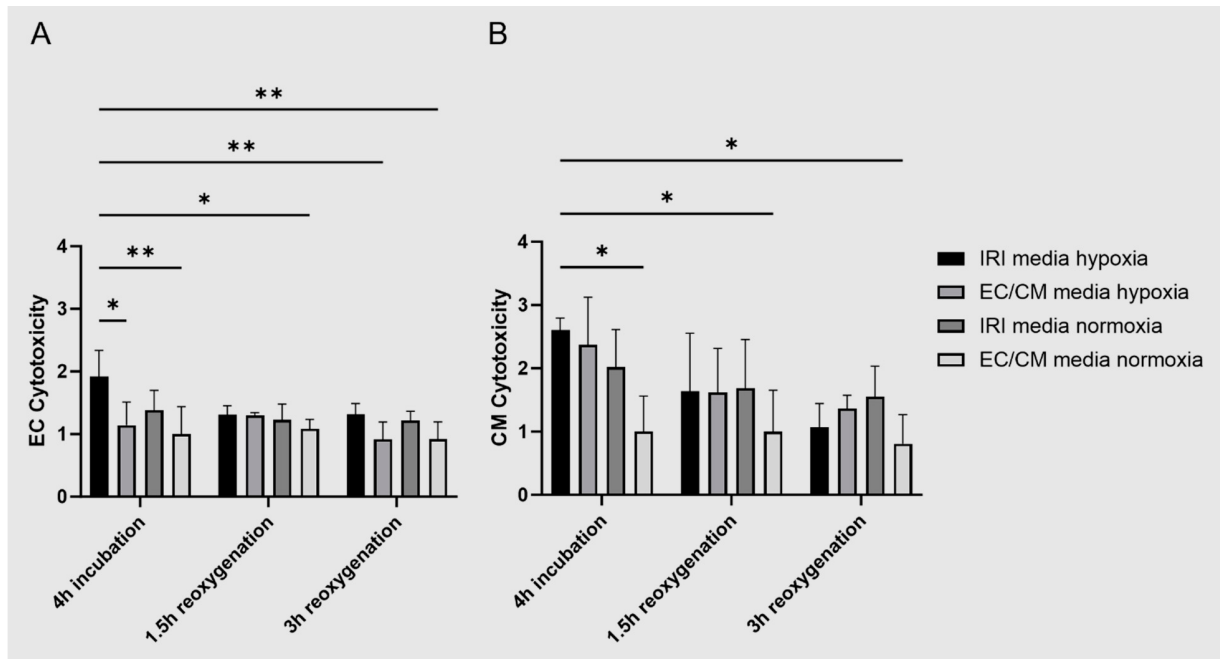

**Supplemental Figure S3.** Membrane integrity of endothelial cells (EC) and cardiomyocytes (CM) in an ischemia-reoxygenation model. A-B. Membrane integrity assay (LDH) indicates that ischemic medium is necessary to promote cell injury after 4 hours of hypoxia.

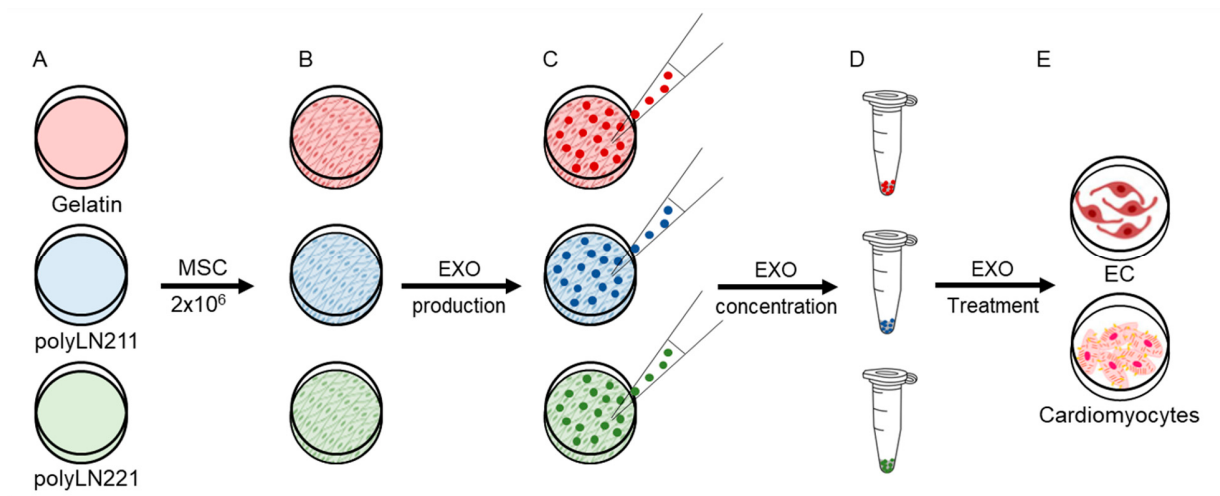

**Supplemental Figure S4.** Schematic diagram of EXO-LAMA2 production. A. Plates were coated with gelatin (red), polyLN211 (blue), and polyLN221 (green) overnight. MSCs were plated under different substrates (B), and EXOs were collected (C) and concentrated (D) for in vitro experiments (E).

**Supplemental Table S1.** List of the main unsupervised hierarchical clustering genes between Gelatin- polyLN211 and polyLN221.

| Gelatin      | PolyLN211 | PolyLN221    | Name                                                       | Function                                                                                                                                                                                                                                                                                                                                                                             |
|--------------|-----------|--------------|------------------------------------------------------------|--------------------------------------------------------------------------------------------------------------------------------------------------------------------------------------------------------------------------------------------------------------------------------------------------------------------------------------------------------------------------------------|
| NDUFS8       |           |              | NADH:Ubiquinone Oxidoreductase Core Subunit S8             | The encoded protein is involved in the binding of iron-sulfur clusters of Complex I and, as such, is required in the electron transfer process.                                                                                                                                                                                                                                      |
| SLCO5A1      |           | SLCO5A1      | Solute Carrier Organic Anion Transporter Family Member 5A1 | Predicted to be involved in sodium-independent organic anion transport. Located in intracellular membrane-bounded organelle and plasma membrane                                                                                                                                                                                                                                      |
| LOC107987279 |           | LOC107987279 |                                                            | Uncharacterized. Affiliated with the ncRNA class.                                                                                                                                                                                                                                                                                                                                    |
| GAPDH        | GAPDH     |              | Glyceraldehyde-3-Phosphate Dehydrogenase                   | The product of this gene catalyzes an energy-yielding step in carbohydrate metabolism.                                                                                                                                                                                                                                                                                               |
| EEF1A1       | EEF1A1    |              | Eukaryotic Translation Elongation Factor 1 Alpha 1         | Responsible for the enzymatic delivery of aminoacyl tRNAs to the ribosome.                                                                                                                                                                                                                                                                                                           |
| RAB13        | RAB13     |              | Ras-Related Protein Rab-13                                 | Regulates membrane trafficking between trans-Golgi network and recycling endosomes. The encoded protein is involved in the assembly of tight junctions. Plays a role in forming a barrier between luminal contents and the underlying tissue. Additional functions associated with the protein include endocytic recycling of occludin and regulation of epithelial cell scattering. |
| BCYRN1       | BCYRN1    |              | Brain Cytoplasmic RNA 1                                    | Its product represents an example of a primate tissue-specific RNA polymerase III transcript.                                                                                                                                                                                                                                                                                        |
| FTH1         | FTH1      |              | Ferritin Heavy Chain 1                                     | Encodes the heavy subunit of ferritin, the major intracellular iron storage protein in prokaryotes and eukaryotes. A major function of ferritin is the storage of iron in a soluble and nontoxic state.                                                                                                                                                                              |
| ACTB         | ACTB      |              | Actin Beta                                                 | Involved in cell motility, structure, integrity, and intercellular signaling. The encoded protein is a major constituent of the contractile apparatus and one of the two non-muscle cytoskeletal actins that are ubiquitously expressed.                                                                                                                                             |
| CDC27P10     |           | CDC27P10     | Cell Division Cycle 27 Pseudogene 10                       | Uncharacterized pseudogene                                                                                                                                                                                                                                                                                                                                                           |
| LOC107987294 |           |              |                                                            | Uncharacterized RNA Gene, affiliated with the ncRNA class                                                                                                                                                                                                                                                                                                                            |
| NDUFS7       | NDUFS7    | NDUFS7       | NADH:Ubiquinone Oxidoreductase Core Subunit S7             | Subunit of one of the complexes that forms the mitochondrial respiratory chain. This complex functions in the transfer of electrons from NADH to the respiratory chain, and ubiquinone is believed to be the immediate electron acceptor for the enzyme.                                                                                                                             |
|              | RNR2      |              | RNA, Ribosomal Cluster 2                                   | Affiliated with the cluster RNA class. Among its related pathways are peptide chain elongation.                                                                                                                                                                                                                                                                                      |
|              | RNR1      |              | RNA, Ribosomal Cluster 1                                   | Affiliated with the cluster RNA class. Among its related pathways are peptide chain elongation.                                                                                                                                                                                                                                                                                      |
|              | VIM       |              | Vimentin                                                   | Intermediate filaments, along with microtubules and actin microfilaments, make up the cytoskeleton. Responsible for maintaining                                                                                                                                                                                                                                                      |

|              |              |                                                                                 |                                                                                                                                                                                                                                                                                                                                                                                                                                   |
|--------------|--------------|---------------------------------------------------------------------------------|-----------------------------------------------------------------------------------------------------------------------------------------------------------------------------------------------------------------------------------------------------------------------------------------------------------------------------------------------------------------------------------------------------------------------------------|
| RN7SL2       | RN7SL2       | RNA Component of Signal Recognition Particle 7SL2                               | cell shape and integrity of the cytoplasm and stabilizing cytoskeletal interactions. Involved in cell attachment, migration, and signaling. Cytoplasmic ribonucleoprotein complex that mediates cotranslational insertion of secretory proteins into the lumen of the endoplasmic reticulum.                                                                                                                                      |
| RN7SL1       |              | RNA Component of Signal Recognition Particle 7SL1                               | Cytoplasmic ribonucleoprotein complex that mediates cotranslational insertion of secretory proteins into the lumen of the endoplasmic reticulum.                                                                                                                                                                                                                                                                                  |
| KCNA7        | KCNA7        | Potassium Voltage-Gated Channel Subfamily A Member 7                            | Expressed preferentially in skeletal muscle, heart, and kidney. Functions include regulating neurotransmitter release, heart rate, insulin secretion, neuronal excitability, epithelial electrolyte transport, smooth muscle contraction, and cell volume.                                                                                                                                                                        |
| LOC107985681 | LOC107985681 |                                                                                 | Uncharacterized. Affiliated with the ncRNA class.                                                                                                                                                                                                                                                                                                                                                                                 |
| DONSON       | DONSON       | DNA Replication Fork Stabilization Factor DONSON                                | Replisome component that maintains genome stability by protecting stalled or damaged replication forks.                                                                                                                                                                                                                                                                                                                           |
| MLLT3        | MLLT3        | Myeloid/Lymphoid Or Mixed-Lineage Leukemia Translocated To Chromosome 3 Protein | Enables chromatin binding activity and lysine-acetylated histone binding activity. Involved in several processes, including hematopoietic stem cell differentiation; positive regulation of transcription, DNA-templated; and regulation of stem cell division. Acts upstream of or within negative regulation of canonical Wnt signaling pathway and positive regulation of Wnt signaling pathway, planar cell polarity pathway. |
| TBP          | TBP          | TATA-Box Binding Protein                                                        | May participate in basal transcription, serve as coactivators, function in promoter recognition, or modify general transcription factors to facilitate complex assembly and transcription initiation.                                                                                                                                                                                                                             |
| BDH1         | BDH1         | 3-Hydroxybutyrate Dehydrogenase (Heart, Mitochondrial)                          | The encoded protein catalyzes the interconversion of acetoacetate and (R)-3-hydroxybutyrate, the two major ketone bodies produced during fatty acid catabolism.                                                                                                                                                                                                                                                                   |
| C5orf66-AS1  |              | Esophagus Epithelial Intergenic Associated Transcript                           | Uncharacterized. Affiliated with the lncRNA class                                                                                                                                                                                                                                                                                                                                                                                 |
| LOC105374347 |              |                                                                                 | Uncharacterized. Affiliated with the ncRNA class.                                                                                                                                                                                                                                                                                                                                                                                 |
|              | AR           | Androgen Receptor                                                               | Ligand-activated transcription factor that regulates eukaryotic gene expression and affects cellular proliferation and differentiation in target tissues.                                                                                                                                                                                                                                                                         |

**Supplemental Table S2.** List of differentially expressed genes between polyLN211 and Gelatin with  $p < 0.01$ .

| Protein                                        | Gene     | Log Fold Change | Main Function                                                                                                                                                                                                                  |
|------------------------------------------------|----------|-----------------|--------------------------------------------------------------------------------------------------------------------------------------------------------------------------------------------------------------------------------|
| Heat Shock Protein Family A (Hsp70) Member 8   | HSPA8    | 6.580543        | Heat-shock protein, chaperone, facilitate correct folding, ATPase in the disassembly of clathrin-coated vesicles during transport of membrane components through the cell.                                                     |
| NEXN Antisense RNA 1*                          | NEXN-AS1 | 5.703816        | Lung cancer and septic myocarditis diseases associated.                                                                                                                                                                        |
| Cyclin D3                                      | CCND3    | -4.6824         | Cyclins function as regulators of CDK kinases.                                                                                                                                                                                 |
| Glutamate Metabotropic Receptor 6              | GRM6     | -4.89148        | G-protein coupled receptor for glutamate, triggers signaling via guanine nucleotide-binding proteins (G proteins), modulates the activity and inhibits adenylate cyclase, stimulates TRPM1 channel activity and Ca(2+) uptake. |
| Phosphoinositide-3-Kinase Regulatory Subunit 1 | PIK3R1   | -5.00752        | Glucose uptake and glycogen synthesis in insulin-sensitive tissues; signaling in response to FGFR1, FGFR2, FGFR3, FGFR4, KITLG/SCF, KIT, PDGFRA, PDGFRB, ITGB2; and modulates the cellular response to ER stress.              |
| EvC Ciliary Complex Subunit 2*                 | EVC2     | -5.18591        | Bone formation and skeletal development.                                                                                                                                                                                       |
| Insulin Like Growth Factor 2 Receptor          | IGF2R    | -6.81168        | Intracellular trafficking of lysosomal enzymes, activation of transforming growth factor beta, and the degradation of insulin-like growth factor 2.                                                                            |
| LanC Like Family Member 3*                     | LANCL3   | -7.15292        | Carbohydrate metabolic process.                                                                                                                                                                                                |
| MAU2 Sister Chromatid Cohesion Factor          | MAU2     | -7.36101        | Cohesin loading and maintenance of mitotic sister chromatid cohesion.                                                                                                                                                          |
| REXO1 Like 1, Pseudogene                       | REXO1L1P | -7.44354        | Nucleic acid binding and exonuclease activity.                                                                                                                                                                                 |

\*New mRNA described in human exosome according to Vesiclepedia's 2024.

**Supplemental Table S3.** List of differentially expressed genes between polyLN221 and Gelatin with  $p < 0.01$ .

| Protein                                  | Gene   | Log Fold Change | Main Function                                                                                                                                                                                                                                                                                                                                                                                                                                                        |
|------------------------------------------|--------|-----------------|----------------------------------------------------------------------------------------------------------------------------------------------------------------------------------------------------------------------------------------------------------------------------------------------------------------------------------------------------------------------------------------------------------------------------------------------------------------------|
| Thymosin Beta 4 X-Linke                  | TMSB4X | 9.061362        | Actin sequestering protein and has role in regulation of actin polymerization and cell proliferation, migration, and differentiation.                                                                                                                                                                                                                                                                                                                                |
| Ribosomal Protein L11                    | RPL11  | 8.294152        | Ribosomal component of the 60S subunit.                                                                                                                                                                                                                                                                                                                                                                                                                              |
| NME/NM23 Nucleoside Diphosphate Kinase 2 | NME2   | 8.267342        | Nucleoside diphosphate kinase; pyrimidine, and nucleotides metabolism.                                                                                                                                                                                                                                                                                                                                                                                               |
| Ribosomal Protein L28                    | RPL28  | 6.802163        | Ribosomal component of the 60S subunit. Peptide chain elongation and rRNA processing in the nucleus and cytosol.                                                                                                                                                                                                                                                                                                                                                     |
| Ribosomal Protein L35                    | RPL35  | 6.740447        | Ribosomal component of the 60S subunit. Peptide chain elongation and rRNA processing in the nucleus and cytosol.                                                                                                                                                                                                                                                                                                                                                     |
| Ras-Related Protein Rab-13               | RAB13  | 6.029683        | G proteins and plays a role in regulating membrane trafficking between trans-Golgi network and recycling endosomes; assembly of tight junctions, which are components of the apical junctional complex of epithelial cells; the complex plays a role in forming a barrier between luminal contents and the underlying tissue. Endocytic recycling of occludin, regulation of epithelial cell scattering, neuronal regeneration, and regulation of neurite outgrowth. |
| Thymosin Beta-10                         | TMSB10 | 5.64525         | Predicted to enable actin monomer binding activity, regulation of cell migration and sequestering of actin monomers. Predicted to be located in cytoskeleton and to be active in cytoplasm, VEGFA-VEGFR2 signaling and Extrafollicular and follicular B cell activation by SARS-CoV-2.                                                                                                                                                                               |
| Metallothionein-2                        | MT2A   | 5.502487        | Bind divalent heavy metal ions, altering the intracellular concentration of heavy metals in the cell. Act as antioxidants, protect against hydroxyl free radicals, and are important in homeostatic control of metal in the cell. Role in detoxification of heavy metals. Controls intracellular zinc levels, affecting apoptotic and autophagy pathways. Related pathways are Metal ion SLC transporters and interferon gamma signaling.                            |
| Elongation Factor 1-Gamma                | EEF1G  | 5.276311        | Enzymatic delivery of aminoacyl tRNAs to the ribosome, may be involved in regulating the assembly of multisubunit complexes containing this elongation factor and aminoacyl-tRNA synthetases. Related pathways are Signaling by ALK in cancer and Peptide chain elongation.                                                                                                                                                                                          |
| Calmodulin 1                             | CALM1  | 5.073639        | Calcium-induced activation of calmodulin regulates and modulates the function of cardiac ion channels.                                                                                                                                                                                                                                                                                                                                                               |
| Trafficking Kinesin Protein 2            | TRAK2  | 5.042845        | Predicted to enable GABA receptor binding activity and myosin binding activity, mitochondrion distribution; organelle transport along microtubule; and protein targeting. Related pathways Miro GTPase Cycle and Signaling by Rho GTPases.                                                                                                                                                                                                                           |

|                                                   |              |          |                                                                                                                                                                                                                                                                                                                                                                                                                                                                               |
|---------------------------------------------------|--------------|----------|-------------------------------------------------------------------------------------------------------------------------------------------------------------------------------------------------------------------------------------------------------------------------------------------------------------------------------------------------------------------------------------------------------------------------------------------------------------------------------|
| Microtubule Crosslinking Factor 1*                | MTCL1        | 4.938853 | Enables microtubule binding activity. Predicted to be involved in establishment or maintenance of epithelial cell apical/basal polarity; microtubule bundle formation; and positive regulation of protein targeting to membrane.                                                                                                                                                                                                                                              |
| Kinesin Family Member 1C                          | KIF1C        | 4.561988 | Member of the kinesin-like protein family- microtubule-dependent molecular motors that transport organelles within cells and move chromosomes during cell division. Related pathways are Golgi-to-ER retrograde transport and Vesicle-mediated transport.                                                                                                                                                                                                                     |
| Exocrine Differentiation And Proliferation Factor | PPDPF        | 4.298254 | Predicted to be involved in cell differentiation.                                                                                                                                                                                                                                                                                                                                                                                                                             |
| FAT Atypical Cadherin 3*                          | FAT3         | -4.77278 | Predicted to enable calcium ion binding activity, cell-cell adhesion, negative regulation of dendrite development; neuron migration; and retina layer formation, integral component of membrane.                                                                                                                                                                                                                                                                              |
| Insulin Like Growth Factor 2 Receptor             | IGF2R        | -4.78492 | Receptor for both insulin-like growth factor 2 and mannose 6-phosphate. Related pathways are Apoptotic Pathways in Synovial Fibroblasts and Innate Immune System.                                                                                                                                                                                                                                                                                                             |
| Asialoglycoprotein Receptor 2*                    | ASGR2        | -4.81463 | Transmembrane receptor protein that plays a critical role in serum glycoprotein homeostasis by mediating the endocytosis and lysosomal degradation of glycoproteins with exposed terminal galactose or N-acetyl galactosamine residues. May facilitate hepatic infection by multiple viruses including hepatitis B and is also a target for liver-specific drug delivery. Related pathways are Metabolism of proteins and Transport to the Golgi and subsequent modification. |
| Phosphoinositide-3-Kinase Regulatory Subunit 1    | PIK3R1       | -4.89496 | Phosphorylates the inositol ring of phosphatidylinositol, role in the metabolic actions of insulin. Related pathways are Prolactin Signaling and IL-9 Signaling Pathways.                                                                                                                                                                                                                                                                                                     |
| Forkhead Box K1                                   | FOXK1        | -5.25328 | Enables 14-3-3 protein binding activity; DNA-binding transcription repressor activity, RNA polymerase II-specific; and transcription cis-regulatory region binding activity. Involved in several processes, including cellular glucose homeostasis; negative regulation of autophagy; and regulation of transcription, DNA-templated. Related pathways are Metabolism of proteins and Deubiquitination.                                                                       |
| EvC Ciliary Complex Subunit 2*                    | EVC2         | -5.60179 | Functions in bone formation and skeletal development.                                                                                                                                                                                                                                                                                                                                                                                                                         |
| MAU2 sister chromatid cohesion factor             | MAU2         | -6.06964 | Enables protein N-terminus binding activity. Involved in cohesin loading and maintenance of mitotic sister chromatid cohesion. Part of Scc2-Scc4 cohesin loading complex.                                                                                                                                                                                                                                                                                                     |
| Uncharacterized                                   | LOC107986445 | -7.41473 | -                                                                                                                                                                                                                                                                                                                                                                                                                                                                             |
| Cytochrome C Oxidase Assembly Factor 5            | COA5         | -7.47343 | Ortholog of yeast Pet191, which in yeast is a subunit of a large oligomeric complex associated with the mitochondrial inner membrane and required for the assembly of the cytochrome c oxidase complex.                                                                                                                                                                                                                                                                       |

|                                                       |              |          |                                                                                                                                                                                                                                                                                                                                                                                              |
|-------------------------------------------------------|--------------|----------|----------------------------------------------------------------------------------------------------------------------------------------------------------------------------------------------------------------------------------------------------------------------------------------------------------------------------------------------------------------------------------------------|
| Glycoprotein Nmb                                      | GPNUMB       | -7.50249 | Type I transmembrane glycoprotein that shows homology to the pMEL17 precursor, a melanocyte-specific protein. GPNUMB may be involved in growth delay and reduction of metastatic potential.                                                                                                                                                                                                  |
| Mitogen-Activated Protein Kinase Binding Protein 1    | MAPKBP1      | -7.52437 | Scaffold protein that regulates the JNK (c-Jun N-terminal kinase) and NOD2 (nucleotide-binding oligomerization domain-containing protein 2) signaling pathways.                                                                                                                                                                                                                              |
| Versican                                              | VCAN         | -7.61094 | Member of the aggrecan/versican proteoglycan family, a large chondroitin sulfate proteoglycan and is a major component of the extracellular matrix. Related in cell adhesion, proliferation, proliferation, migration, and angiogenesis and plays a central role in tissue morphogenesis and maintenance.                                                                                    |
| Heparan Sulfate D-Glucosaminyl 3-O-Sulfotransferase 1 | HS3ST1       | -7.63847 | Enzymes are key components in generating a myriad of distinct heparan sulfate fine structures that carry out multiple biologic activities.                                                                                                                                                                                                                                                   |
| Indian Hedgehog Signaling Molecule                    | IHH          | -7.64507 | Member of the hedgehog family of proteins, generate multiple protein products, including an N-terminal fragment that is involved in signaling. Essential for secreted signaling molecules that regulate a variety of developmental processes including growth, patterning, and morphogenesis. The protein encoded by this gene specifically plays a role in bone growth and differentiation. |
| Uncharacterized                                       | LOC105370567 | -7.73373 | -                                                                                                                                                                                                                                                                                                                                                                                            |
| LanC-Like Protein 3 *                                 | LANCL3       | -7.76518 | Predicted to be involved in carbohydrate metabolic process.                                                                                                                                                                                                                                                                                                                                  |
| Uncharacterized                                       | LOC100130207 | -7.88387 | -                                                                                                                                                                                                                                                                                                                                                                                            |
| Cell Division Cycle 27 Pseudogene 9*                  | CDC27P9      | -8.12456 | Pseudogene                                                                                                                                                                                                                                                                                                                                                                                   |

\*New mRNA described in human exosome according to Vesiclepedia's 2024.

**Supplemental Table S4.** List of differentially expressed genes between polyLN211 and polyLN221 with  $p < 0.01$ .

| Protein                                                             | Gene     | Log Fold Change | Main Function                                                                                                                                                                                                                                                         |
|---------------------------------------------------------------------|----------|-----------------|-----------------------------------------------------------------------------------------------------------------------------------------------------------------------------------------------------------------------------------------------------------------------|
| SH3 domain binding glutamate rich protein like 3                    | SH3BGRL3 | 7.553577        | Nuclear body.                                                                                                                                                                                                                                                         |
| acidic nuclear phosphoprotein 32 family member B                    | ANP32B   | 8.077543        | Enables RNA polymerase binding activity and histone binding activity, apoptosis; nucleosome assembly; and positive regulation of protein export from nucleus.                                                                                                         |
| tropomyosin 2                                                       | TPM2     | 8.073332        | Member of the actin filament binding protein family, and mainly expressed in slow, type 1 muscle fibers.                                                                                                                                                              |
| ribosomal protein S19                                               | RPS19    | 7.870294        | Component of the 40S ribosomal subunit; extra-ribosomal function in differentiation and proliferation.                                                                                                                                                                |
| ribosomal protein L12                                               | RPL12    | 7.683415        | Ribosomal protein that is a component of the 60S subunit.                                                                                                                                                                                                             |
| tropomyosin 4                                                       | TPM4     | 7.419697        | Actin-binding proteins involved in the contractile system of striated and smooth muscles and the cytoskeleton of non-muscle cells. Tropomyosins are dimers of coiled-coil proteins that polymerize end-to-end along the major groove in most actin filaments.         |
| endothelial differentiation related factor 1                        | EDF1     | 7.324753        | Regulate endothelial cell differentiation, lipid metabolism, and hormone-induced cardiomyocyte hypertrophy.                                                                                                                                                           |
| pancreatic progenitor cell differentiation and proliferation factor | PPDPF    | 7.286403        | Predicted to be involved in cell differentiation.                                                                                                                                                                                                                     |
| ribosomal protein S16                                               | RPS16    | 7.229725        | Ribosomal component of the 40S subunit. The protein belongs to the S9P family of ribosomal proteins.                                                                                                                                                                  |
| major histocompatibility complex, class II, DR beta 1               | HLA-DRB1 | 7.018186        | Immune system by presenting peptides derived from extracellular proteins.                                                                                                                                                                                             |
| trafficking kinesin protein 2                                       | TRAK2    | 6.708681        | Predicted to enable GABA receptor binding activity and myosin binding activity; active in cytoplasmic vesicle; dendrite; and mitochondrion.                                                                                                                           |
| ribosomal protein L13a                                              | RPL13A   | 6.572105        | Component of the 60S subunit; repression of inflammatory genes as a component of the IFN-gamma-activated inhibitor of translation complex.                                                                                                                            |
| metallothionein 2A                                                  | MT2A     | 5.665103        | Bind divalent heavy metal ions, altering the intracellular concentration of heavy metals in the cell; antioxidants, protect against hydroxyl free radicals, important in homeostatic control of metal in the cell, and play a role in detoxification of heavy metals. |

|                                                    |         |          |                                                                                                                                                                                                               |
|----------------------------------------------------|---------|----------|---------------------------------------------------------------------------------------------------------------------------------------------------------------------------------------------------------------|
| S100 calcium binding protein A6                    | S100A6  | 5.647878 | 2 EF-hand calcium-binding motifs; may function in stimulation of Ca <sup>2+</sup> -dependent insulin release, stimulation of prolactin secretion, and exocytosis.                                             |
| galectin 1                                         | LGALS1  | 5.186484 | Member of beta-galactoside-binding proteins family, modulation of cell-cell and cell-matrix interactions. This gene product may act as an autocrine negative growth factor that regulates cell proliferation. |
| ANTXR cell adhesion molecule 1                     | ANTXR1  | 5.005585 | Type I transmembrane protein, tumor-specific endothelial marker for colorectal cancer; receptor for <i>Bacillus anthracis</i> toxin.                                                                          |
| ribosomal protein L39                              | RPL39   | 4.648474 | Component of the 60S subunit.                                                                                                                                                                                 |
| ferritin light chain                               | FTL     | 4.524936 | Major intracellular iron storage protein, iron uptake and release in different tissues.                                                                                                                       |
| RNA component of signal recognition particle 7SL2* | RN7SL2  | 4.376611 | The signal recognition particle is a cytoplasmic ribonucleoprotein complex that mediates cotranslational insertion of secretory proteins into the lumen of the endoplasmic reticulum.                         |
| Cell Division Cycle 27 Pseudogene 9*               | CDC27P9 | -9.08347 | -                                                                                                                                                                                                             |

\*New mRNA described in human exosome according to Vesiclepedia's 2024.
